# Supplementary material for: Molecular mechanism of phytohormones regulating dormancy and germination of barley seeds
Source: Research Square preprint supplement (doi:10.21203/rs.3.rs-6858206/v1), 2025-07-15
Supplement: Supplementary file 1 [file f0364f07f9345d0b6b9268ca.xlsx]

## Sheet: Table S1
Table S1 236 barley for 24 h, 48 h, 72 h germination percentage and germination index
	2021-2022				2022-2023
variety	24 h germination rate	48 h germination rate	72 h germination rate	Germination index	24 h germination rate	48 h germination rate	72 h germination rate	Germination index
Spanish landrace 309d	9.16667	62.5	82.2222	42.4074	32.3333	82.6667	88.3333	59.3889
Spanish landrace 338c	38.3333	80.8333	88.8889	62.2685	18	48.6667	54.6667	35.3333
M94060003	59.1667	92.5	95.5556	76.8519	24.6667	64.6667	72.6667	47.3333
H95011020	55.8333	87.5	97.7778	75.0926	34	91.6667	99	65.2778
XVD21	9.16667	56.6667	62.2222	34.7685	4.33333	18	53.3333	22.9444
XVF11	18.8889	52.2222	53.3333	35.9259	17.6667	51	71.3333	41.1111
XVH9	26.6667	87.5	87.7778	57.1759	18.3333	70.3333	80.6667	47.7778
BENTON	28.8889	58.8889	65.5556	46.1111	39	71	76	56.6667
ETHIOPIA 530	52.5	100	100	76.25	56	78.3333	82	68.3889
ETHIOPIA 700	88.3333	96.6667	97.7778	92.8704	36.3333	92	92.3333	64.2778
VB9104/Dash//2*Baudin	51.6667	90	92.2222	71.5741	22.6667	61.3333	73.3333	46
137 UM	79.1667	92.5	97.7778	87.5926	71.3333	90	93	81.6667
142 UM	65	90.8333	93.3333	78.75	24.6667	68	78.6667	49.8889
146G1((((VB12/20/36/1/3/2 x EMIR) x FLEET) x FLEET) x FLEET) x 1095-1	75	95	96.6667	85.5556	14.6667	77.6667	94	51.6111
154 UM	44.1667	80	86.6667	64.3056	21.3333	43.6667	52.6667	35.5
181P158/2/M1-BFP111	18.8889	25.5556	27.7778	22.963	20	82.3333	95	55.3889
181P237/7/M1/M1	24.4444	44.4444	50	36.2963	10.6667	39.3333	53	29.5556
181P94/1/3/1/1/1-2	28.3333	61.6667	70	47.7778	2	25.6667	43.3333	19.7222
20 UM	46.6667	88.3333	93.3333	69.1667	27	56.3333	65.3333	44.6667
203S4/M1	11.1111	36.6667	55.5556	30.1852	11.6667	51.6667	72.3333	38.5556
21 UM	72.5	82.5	80	76.6667	9.33333	31	59.3333	29.6111
907-12 x W58T4	56.6667	98.8889	98.8889	77.7778	23.3333	71	75.6667	48.7222
220A23/M1/M1	63.3333	87.7778	90	76.2963	34.6667	56.6667	73.6667	51.3333
220A40/M3/M1	61.6667	92.5	91.1111	76.6204	29	62.3333	68.6667	47.7778
228Q1/17/M1/M1	22.3333	80	88	53.8333	18	43.6667	50.6667	33.1667
228Q1/25/M1/M1	57.5	95	97.7778	77.1759	21	54.3333	63.6667	40.7778
230H13/17/M1/M1	59.1667	77.5	88.8889	72.1296	26	60.3333	64.6667	44.6111
261B1	18.3333	75.8333	86.6667	50.6944	12.6667	40.6667	61.6667	33.6667
266G4	21.1111	45.5556	55.5556	36.6667	12.6667	73.6667	86.3333	47.3889
293G8	51.6667	79.1667	90	69.0278	7.66667	28.6667	58.3333	28.0556
2B03-3604	55	95.8333	96.6667	75.6944	35	65	90.3333	58.4444
2B03-3954	62.5	88.3333	94.4444	77.4537	36.6667	53	57.6667	46.3889
2B99-2316-4	11.6667	41.6667	56.6667	31.6667	5.66667	44.6667	61.6667	30.8333
309T1	40	77.5	84.4444	61.0648	6.33333	44.6667	61.6667	31.1667
311M1	54.4444	88.8889	90	72.037	23.3333	71.3333	86.3333	52.3333
311M1	65.8333	94.1667	95.5556	80.463	16.6667	76	89.6667	50.8889
315W3	23.3333	55.8333	68.8889	43.9352	5.33333	31.6667	54.6667	26.1667
327Z1	15.8333	59.1667	71.1111	41.4815	1.33333	17.6667	35	15.2778
33 UM	82.5	95.8333	97.7778	89.8148	44.3333	77.6667	87.3333	64.2222
47-13	36.6667	56.6667	70	51.1111	11.6667	25.3333	31.6667	20.6111
48 UM	79.1667	92.5	97.7778	87.5926	67.3333	91.3333	99	81.8889
50-57	55.6667	94	98.3333	76.2778	44	93.6667	96.6667	69.8333
67 UM	31.6667	90.8333	94.4444	62.4537	10	95	98.3333	53.6111
68-15	14.1667	50.8333	67.7778	38.1481	35	80	84	58.8333
68-32	8.33333	61.6667	80	41.1111	46	75.6667	83	63.2778
87 UM	62.6667	96	96.6667	79.5556	77.6667	93.6667	94.3333	85.8889
907-12	2.5	38.3333	57.7778	26.8981	13.3333	45.3333	52.3333	31.6667
Barley breeding line (no introgression)	30.8333	83.3333	86.6667	58.1944	4.33333	31	40.6667	20.8889
Albaicin	0	35	63.3333	26.9444	9	54	80	40.1667
Amulet	15.8333	63.3333	83.3333	46.25	3.66667	68.3333	85	41.5556
Annabell	12.5	80	83.3333	47.3611	9.66667	72.3333	80.3333	43.6667
Annabell	40	80.8333	81.1111	60.5093	36.6667	75.6667	91	61.2778
Ariel	28.3333	87.5	95.5556	60.6019	5.66667	63.6667	86.3333	42.2222
ARMELLE	41.6667	70	71.1111	56.2037	25.3333	89	96.3333	59.6111
ATLAS 46	26.6667	79.1667	82.2222	53.9352	54	80.6667	88	69.7778
Atribut	48.3333	78.3333	76.6667	62.7778	13.6667	59.3333	72.6667	40.9444
BANDIT	63.3333	86.6667	87.7778	75.3704	61.3333	93.6667	96	78.2778
BLACKHULL	55	84.1667	87.7778	70.787	16.3333	66	85.6667	47.7222
BM9831-42	10	48.3333	55.6667	31.6111	9	46.3333	55.6667	30.7778
BM9845-6	41.1111	85.5556	88.3333	64.2593	14.3333	44.3333	67.6667	37.1111
BM9856D-151	79.1667	95.8333	97.7778	88.1481	46.6667	70.3333	76	60.3889
BOLIVIA	27.7778	64.4444	85.5556	53.1481	33.3333	91.3333	95.6667	63.7778
BVA-18	28.3333	67.5	73.3333	49.8611	5.66667	34.3333	64.6667	30.1111
BVA-19	15.3333	69.3333	86	47.8889	17.3333	66	82.3333	47.1111
BVA-22	47.7778	64.4444	67.7778	57.2222	4.33333	25.6667	51.3333	23.5556
BVA-24	14.1667	70	86.6667	47.6389	9	70.3333	89.6667	46.1111
BVA-25	40	85	84.4444	62.3148	4.33333	52.3333	69.3333	34
BVA-9	5.83333	33.3333	58.8889	28.1019	4	27	86	35.1667
BVC-10	11.1111	25.5556	24.4444	17.963	13.3333	75.3333	91.3333	49.6667
BVC-11	16.6667	31.6667	38.8889	26.5741	30.3333	94.6667	98	63.6111
BVC-13	51.6667	72.5	84.4444	66.0648	26	75.3333	90	55.5556
BVC-14	23.3333	40	50	35	64.6667	87.6667	98.6667	79.8333
BVC-16	30	60	60	45	13	77	92	50
BVC-19	42.5	82.5	90	65	20.6667	75.3333	80.6667	49.7778
BVC-20	31.6667	86.6667	91.1111	60.6481	16	66.6667	89.3333	48.8889
BVC-25	25	64.1667	58.8889	42.8241	6.66667	62	90.6667	43.8889
BVC-3	70	93.3333	97	82.8889	68.6667	91.3333	96.3333	81.6667
BVC-6	47.7778	60	64.4444	55.3704	63.6667	88	98.3333	79.2778
BVD-10	60	77.7778	88.8889	72.5926	39.6667	90	95	66.5
BVD-11	38.8889	72.2222	68.3333	54.2593	35.6667	88	96	64.5
BVD-16	10	58.3333	63.3333	35.8333	32.6667	93	98.3333	64.6111
BVD-17	15.8333	41.6667	55.5556	33.3796	12	83.6667	95.3333	51.7222
BVD-23	10.8333	58.3333	71.1111	38.8426	29.3333	91.3333	97.6667	62.4444
BVD-24	41.1111	66.6667	75.5556	56.8519	22.3333	91	96	58.3333
BVD-3	41.1111	58.8889	70	53.7037	15.6667	76	89	50.1667
BVD-5	9.16667	40.8333	44.4444	26.2037	15	82.3333	92	51.8889
BVD-6	40	67.7778	72.2222	55.3704	10.3333	78	92	48.8333
BVDV-008	97.5	99.1667	98.8889	98.2407	56.3333	90.6667	95.6667	75.1667
BYDV 2	25	50.3333	81.6667	48.1111	25	50.3333	81.6667	48.1111
BYDV 42	28.8889	47.7778	60	42.4074	41.6667	74.6667	79	59.6111
C2-05-337-2	4.33333	23.6667	38	18.7778	5.33333	25.6667	35	18.6111
CAL 1311	44.4444	61.1111	65.5556	54.2593	12.6667	59	73.6667	40.7222
Caminant	8.33333	33.3333	51.1111	26.7593	3.33333	11.6667	36.6667	15.8333
GOB/HUMAI10/3/MPYT169.1Y/LAUREL//OLMO/4/CANELA	71.1111	86.6667	88.8889	79.6296	34	78.3333	89.6667	59.9444
Cecilia	27.7778	38.8889	53.3333	38.1481	14	48.3333	63	36.0556
Celinka	22.5	66.6667	77.7778	48.287	8.66667	20	32	18.3333
CEPADA CAPA	13.3333	42.2222	51.1111	30.7407	16.3333	86	92.6667	53.3889
CI4364	87.5	95	95.5556	91.4352	36	88.3333	92.3333	63.5
CI5791	98.8889	98.8889	98.8889	98.8889	15.3333	38.6667	48.3333	30.2222
CI5831	82.5	93.3333	97.7778	89.3981	19.3333	27.6667	32.6667	25.1667
CI8618	20	43.3333	51.1111	34.2593	19	32	42.3333	28.9444
CI9819	93.3333	97.7778	98.8889	95.9259	44	68	73.3333	57.7778
CLE 187	57.5	91.6667	91.1111	74.3981	48.3333	83	87	67
CLE 235	34.4444	63.3333	71.1111	51.4815	10.6667	54.3333	74	39.0556
CMSWB77A-0115 1AP-1AP-1AP-0AP	26.6667	70	74.4444	49.8148	13	52	59	34.8333
Danuta	6.66667	32.5	34.4444	20.2315	10	33	63	31.5
Dayton	52.2222	74.4444	74.4444	63.3333	65.6667	81.6667	85.3333	74.8889
Doyen	43.3333	57.7778	64.4444	52.7778	5.33333	12.3333	20	11.3889
Draught	23.3333	61.6667	67.7778	44.537	12.3333	46.6667	65	35.6111
Ellinor	40.8333	73.3333	75.5556	57.8241	12	41	60.3333	32.9444
EMPRESS	28.8889	50	61.1111	43.1481	12.6667	55.3333	71	39.2222
ETHIOPIA 602	91.1111	93.3333	93.3333	92.2222	86	91	93.3333	89.2778
ETHIOPIA 712	84.4444	86.6667	87.7778	85.9259	57.6667	84.3333	90.3333	73
Fractal	11.1111	41.1111	62.2222	33.1481	57.6667	84.3333	90.3333	73
H94034003	58.8889	76.6667	85.5556	70.7407	4.33333	33.6667	80.3333	34.5556
H94061120	77.7778	83.3333	82.2222	80.1852	27	46	52.3333	38.6111
H94084001	44.4444	62.2222	66.6667	54.8148	11.6667	42.6667	77.3333	38.7222
H95011024	52.2222	72.2222	76.6667	63.7037	22.6667	83.6667	93	56.2778
HB10313	100	100	100	100	43.3333	76.3333	86.3333	63.1667
HB10314	98.5185	99.6296	100	99.1975	50.3333	76	83	65.5
HB10315	97.7778	97.7778	97.7778	97.7778	73.3333	81.6667	86	78.9444
HB398	66.6667	71.1111	76.6667	70.7407	64.3333	92.6667	94.3333	79.0556
ICB82-0690-0AP	54.4444	73.3333	74.4444	64.2593	65	93	98	80.6667
IG 112449	1.11111	56.6667	100	43.3333	15	91.6667	92.6667	53.6667
IG 112490	14.4444	67.7778	74.4444	43.3333	66.6667	92.3333	94.6667	80.2778
IG 112492	13.3333	20	24.4444	18.1481	53.3333	88.6667	92.3333	72.2222
IG 112497	34.4444	45.5556	47.7778	40.7407	48	93	94.6667	71.0556
IG 120489	32.2222	85.5556	104.444	65.1852	4.33333	36.6667	47	23.9444
IG 35565	54.4444	67.7778	65.5556	60.3704	44.3333	92.3333	94.3333	69
IG 36062	0	14.4444	23.3333	10.1852	39.6667	87.3333	90.3333	64.5
IG 36063	11	49.6667	63.6667	35	12.3333	51.6667	67.6667	37.3333
Irene	15.5556	32.2222	32.2222	23.8889	4.66667	23.3333	36	18.2222
J03019002	46.6667	74.4444	75.5556	60.9259	15.6667	65.3333	76	44.0556
J03019003	39	55.3333	81.6667	55.9444	18	37	45	30.1667
J99049001	11	52	65.6667	36.0556	18	56.6667	64	39.7778
J99056005	40	60	64.4444	51.4815	5.33333	20	34.6667	17.5556
Lamba	31.1111	51.1111	77.7778	50	17.6667	46.6667	71.6667	40.5
Landlord	20	48.8889	54.4444	36.2963	3.33333	36	52	25
LEWIS	34.4444	66.2963	77.4074	54.0741	15.3333	30	45.3333	27.7778
Linus	7.77778	23.3333	25.5556	16.2963	2.66667	19.3333	31.3333	15
M94257001	22.2222	35.5556	40	30.3704	26.3333	71.6667	88.6667	54.6667
Meltan	24.4444	61.1111	64.4444	43.8889	16	56.3333	83	45.0556
Mentor	17.7778	35.5556	38.8889	27.7778	2	26.3333	46	20.7222
MSS 87	10.3333	26.6667	34.6667	21.1667	12.3333	29.6667	34.6667	22.6667
MSS 88	34.4444	52.2222	72.2222	50	19.6667	43.3333	70.6667	40.6111
MSS 99	76.6667	93.3333	94.4444	85.3704	21	82	89.6667	54.0556
NCL11-99-26	42.2222	64.4444	75.5556	57.037	14.6667	77.3333	92.3333	51
Penelope	25.5556	60	70	46.1111	19.6667	80.3333	92.3333	54
Pongo	27.7778	51.1111	54.4444	40.5556	18	63.6667	84.6667	47.8333
Portuguese landrace	18.8889	38.8889	47.7778	31.8519	19.6667	65.6667	87	49.7778
Potter	11.1111	37.7778	42.2222	25.9259	6	37.3333	59.6667	29.1111
Punto	42.3333	76.3333	86.6667	62.7778	42.3333	76.3333	86.6667	62.7778
QUINN	27.7778	57.7778	66.6667	45.7407	11.3333	60	78.6667	41.8889
Ragtime	32.2222	62.2222	65.5556	48.3333	12.3333	32	54.6667	29.7222
Reggae	25.5556	57.7778	67.7778	45	8.66667	46	48	28
REKA 1	46.6667	82.2222	87.7778	66.2963	59	85.6667	80.6667	70.6667
Riff	51.1111	78.8889	85.5556	67.2222	8.33333	60.6667	83.3333	42.0556
Rifle	44.4444	66.6667	72.2222	57.4074	52.3333	92.3333	97.3333	74
Rosa	36	83.3333	89.6667	61.7778	36	83.3333	89.6667	61.7778
Russia	14	77	85.6667	48.3889	14	77	85.6667	48.3889
Santiago	21.1111	42.2222	51.1111	34.6296	10.3333	68	79.6667	43.0556
SB03180	40	49	53	45.8333	19.3333	57.3333	65	40.8889
SB03702	37.7778	70	74.4444	55.3704	16.6667	68.3333	83.3333	47.5
SB070206	43.3333	71.1111	75.5556	58.7037	35	78.3333	87	59.5556
SB071738	78.8889	95.5556	97.7778	87.963	14	50	64	36.6667
SH040468	78.8889	90	92.2222	85.1852	12	44.3333	72.3333	37.5
SHEBA	85.5556	93.3333	97.7778	90.9259	96.6667	97	98	97.1667
SL39/90-14	31.1111	64.4444	74.4444	51.1111	37.6667	83.3333	91	63.0556
SL44/92C-27	18.8889	32.2222	37.7778	27.4074	6	50.6667	72	35.4444
SLB 39-10	0	13.3333	24.4444	10.3704	16	38.3333	49.3333	30.8333
SLB 45-40	11.1111	44.4444	48.8889	29.2593	12	29.3333	44.6667	25.7778
SM01645	32.2222	66.6667	73.3333	51.6667	14.3333	31.3333	39.6667	25.6111
SM05432	53.3333	67.7778	71.1111	61.6667	5.66667	20	50.6667	23.0556
SM070224	46.6667	84.4444	87.7778	66.6667	14.3333	32.3333	35.6667	24.4444
SM070250 <2R>	44.4444	64.4444	76.6667	58.5185	4.33333	19.6667	25	13.7778
SM070995	13.3333	32.3333	40.6667	25.6111	14.3333	31.3333	39.6667	25.6111
SM081406	40	74.4444	78.8889	58.7037	5	10.6667	22.3333	11.7222
SM081436	28.8889	60	63.3333	45.5556	11	48	57	32.5
SM081544	30	50	60	43.3333	8.33333	38.3333	52.6667	28.1111
Spanish landrace 333	39.6667	94	97	67.8333	23	79.3333	82	52.0556
Spanish landrace 336d	45.5556	72.2222	81.1111	61.8519	12	63.6667	78.6667	42.8333
SR439	47.7778	60	64.4444	55.3704	22	47.6667	54.6667	37.1667
SR441	49.6667	82.6667	90	68.6111	28	65	70.3333	48.2778
SR444	53.3333	71.1111	86.6667	67.4074	35.3333	60.6667	70.3333	51.2222
Stellar-ND	29.3333	51	59	42.8333	29.3333	54.6667	61.3333	44.2222
STEUDELLI	63.3333	90	90	76.6667	5	21.3333	32.3333	16.8333
Toddy	24.4444	51.1111	58.8889	40.3704	4.66667	14.3333	27.3333	13.8333
Tofta	44.4444	57.7778	76.6667	57.4074	8	43	51.6667	28.3889
TR06108	52.2222	70	77.7778	63.7037	12.3333	39.6667	58.3333	32.2222
TR06296	82.2222	90	90	86.1111	12.6667	42	53	31
TR06390	52.2222	86.6667	90	70.5556	12.3333	28.6667	36.3333	23.0556
TR10123	42.2222	62.2222	74.4444	56.2963	15.6667	26	29.6667	22.0556
TR10125	52.3333	65.6667	68	59.7778	15.6667	41.6667	60.3333	34.8889
TR10300	46.6667	66.6667	73.3333	58.8889	16	32	44.6667	28.2222
TR10301	42.3333	82.6667	86.6667	63.8333	21.3333	47.6667	61	38.9444
TR49	7.77778	55.5556	82.2222	40.5556	4.66667	22.6667	39.3333	19.2222
Troon	5	16.3333	26	13.8889	4.66667	16.3333	24	13.0556
USA 8330-1679	5.55556	25.5556	37.7778	19.6296	1.66667	7.66667	9.33333	5.22222
UVA 21	27.7778	62.2222	68.8889	47.2222	7.66667	31	48.3333	25.1111
Valetta**	30	66.6667	75.5556	51.2963	4.33333	45.6667	64.3333	31.2222
Viskosa	27.7778	54.4444	61.1111	43.3333	6.33333	27	45.6667	22.8889
Rika*(Balder*(Binder*Opal))	16	53	66	38.8333	19.6667	55	66	41
Celechovicky Hanacky/Bavaria	47.7778	61.1111	82.2222	61.4815	10	61	81.6667	42.3889
Hanna/Kargyn	61.1111	82.2222	85.5556	72.7778	11.6667	38.6667	87.3333	41.3889
Selection from land race	47.7778	78.8889	87.7778	66.2963	8	50	66.6667	34.5556
WA10997	44.3333	98	99.6667	71.7222	33.6667	88.6667	94.6667	63.1667
LP/GOB91DH/3/Arupo/K8755//Mora	85.5556	91.1111	92.2222	88.7037	33.6667	77.6667	90.3333	59.8889
Psaknon/2*Dampier//Triumph/3/Clipper/4/WA4612	27	72	80	52.1667	27	72	80	52.1667
E. Quebracho//E. Jacaranda/Piccolo	7.77778	32.2222	48.8889	25.5556	8.66667	36.6667	58.6667	30
Aphrodite(Villa/Plenum)/CLE216(Atlas57//PriorA/Ymer/3/B6671)	8.88889	46.6667	70	35.5556	4	26.6667	43	20.7778
WIEBE GA 116-5	48.6667	80.3333	83.3333	65.5	47.6667	75.6667	81	63.4444
WIEBE GA 148-3	28.6667	85.6667	97.6667	61.1667	55	88.3333	91.6667	72.7778
WIEBE GA 83-7	60	73.3333	82.2222	69.6296	33	54	61.3333	45.9444
Bowman/TR473//Ellice/TR451	58.8889	76.6667	95.5556	74.0741	19	55.3333	61.3333	39.1667
XVB17	30.3333	82.3333	92.6667	59.7778	34.3333	67	73.3333	52.7778
XVB19	45.3333	83.3333	96.3333	68.6667	25	70	84.6667	52.3889
XVE7	82.2222	91.1111	93.3333	87.4074	53.6667	83.6667	92	71.4444
XVF27	66.6667	76.6667	78.8889	72.4074	43	88.6667	94.6667	67.8333
XVH11	28	89.6667	95.6667	60.8333	28.6667	74.3333	90	56.7222
XVH6	13.3333	54.4444	63.3333	36.8519	9	42.3333	60.3333	31.6667
XVH8	22.2222	42.2222	48.8889	34.4444	24.6667	60.3333	82.3333	49.8333
Z023Q020R	28.8889	50	56.6667	41.6667	15.6667	65.3333	79.3333	45.1667
Z090M016M	31.1111	78.8889	83.3333	56.4815	14	56.3333	76.3333	41.8333
259	19.6667	39.3333	65	38.0556	19.6667	39.3333	65	38.0556
260	1	11.3333	17	8.05556	1	11.3333	17	8.05556
261	7.66667	26.6667	40.3333	21.7222	7.66667	26.6667	40.3333	21.7222
262	7	20.3333	33.3333	18	7	20.3333	33.3333	18
263	9.66667	44.6667	75.6667	37.5	9.66667	44.6667	75.6667	37.5
264	13	39.3333	51.3333	30.1667	13	39.3333	51.3333	30.1667
Harrington	62.33	92.33	97.33	78.9967	62.33	92.33	97.33	78.9967
Stirling	1	20	50.33	20.61	1	20	50.33	20.61
Ac Mefalfe	13.33	70	73.33	42.775	13.33	70	73.33	42.775
Baudin	3.33	70	76.67	38.8883	3.33	70	76.67	38.8883
Morex	80	92	98	88	88	95	99	92.8333
Barke	83	91	96	88.6667	80	91	97	87.5
Clipper	4.66667	25.6667	51.3333	23.7222	5	23.5	51.3333	23.5278

## Sheet: Table S2
Table S2 Concentrations of barley treated with exogenous hormones phytohormone and concentration levels
ABA （mg/L）	0	0.1	0.5	1	5	10
GA3 （mg/L）	0	2	4	6	8	10
IAA （mg/L）	0	5	10	50	100
6-BA （mg/L）	0	0.5	1	5	10	20
ETH （mg/L）	0	1	5	10	50	100
EBR （mg/L）	0	0.1	0.5	1	5	10
JA （μ mol/L）	0	1	5	10	50	100
SA （mmol/L）	0	0.1	0.5	1	5	10

## Sheet: Table S3
Table S3 RNA-seq data for 260 genes
Pathway	Full-name of gene	Gene	Gene_ID	Harrington 24 h	Harrington 48 h	Stirling 24 h	Stirling 48 h
GA pathway	ent-copalyl diphosphate synthase like 1	CPSL1	HORVU1Hr1G026790	28.6862	20.5022	40.7537	30.5202
	ent-copalyl diphosphate synthase like 1	CPSL1	HORVU2Hr1G004620	35.9124	99.4444	25.5594	74.1615
	ent-copalyl diphosphate synthase like 1	CPSL1	HORVU7Hr1G121270	57.8308	45.2534	72.7796	59.6752
	ent-kaurene oxidase	KO1	HORVU0Hr1G021760	76.5221	118.898	124.248	202.288
	ent-kaurene synthase like	KSL1	HORVU2Hr1G004540	17.8591	41.1426	18.3339	44.2569
	ent-kaurene synthase like	KSL1	HORVU2Hr1G099480	177.97	170.837	224.296	225.605
	ent-kaurene synthase like	KSL1	HORVU2Hr1G099510	5.62328	12.0156	2.36563	5.2966
	ent-kaurenoic acid oxidase	KAO1	HORVU7Hr1G003090	501.413	1520.92	830.201	2638.68
	GA 13-oxidase 1	GA13ox1	HORVU0Hr1G005900	96.1959	108.454	82.4509	97.4036
	GA 13-oxidase 2	GA13ox2	HORVU4Hr1G050930	934.378	1123.37	1194.68	1505.02
	GA 20-oxidase 1	GA20ox1	HORVU5Hr1G124120	704.051	423.555	981.3	618.586
	GA 20-oxidase 2	GA20ox2	HORVU3Hr1G090980	17.1021	8.58032	20.4155	10.7326
	GA 20-oxidase 4	GA20ox4	HORVU1Hr1G063780	89.9398	16.8505	152.014	29.8425
	GA 3-oxidase 2	GA3ox2	HORVU3Hr1G022840	1844.61	1349.04	1442.64	1105.53
	GA 2-oxidase 4	GA2ox4	HORVU1Hr1G023460	2.54244	5.74941	3.45648	8.19028
	GA 2-oxidase 4	GA2ox4	HORVU1Hr1G029520	2.36041	5.79987	4.73576	12.1931
	GA 2-oxidase 4	GA2ox4	HORVU1Hr1G086810	2.99474	17.5436	4.95858	30.4375
	GA 2-oxidase 4	GA2ox4	HORVU2Hr1G090030	27.9871	61.7533	36.5057	84.4027
	GA 2-oxidase 5	GA2ox5	HORVU3Hr1G029010	4.0273	18.031	3.87145	18.1623
	GA 2-oxidase	GA2ox	HORVU6Hr1G058980	13.4438	17.3163	53.4419	72.1287
	GA 2-oxidase	GA2ox	HORVU3Hr1G072810	158.025	58.4978	400.603	155.389
	Gibberellin receptor GID1	GID1	HORVU1Hr1G060810	1117	879.97	1615.08	1333.22
	Gibberellin receptor GID1L2	GID1L2	HORVU4Hr1G081140	5.78406	7.30348	20.256	26.8005
	DELLA protein GAI	DELLA	HORVU4Hr1G006930	4768.29	5458.44	6448.88	7735.4
Pathway	Full-name of gene	Gene	Gene_ID	Harrington 24 h	Harrington 48 h	Stirling 24 h	Stirling 48 h
b: ABA pathway	Zeaxanthin epoxidase	ZEP	HORVU4Hr1G023580	12.8455	67.3123	9.03264	49.5964
	Zeaxanthin epoxidase	ZEP	HORVU2Hr1G078840	333.874	439.423	593.854	818.978
	9-cis-epoxycarotenoid dioxygenase	NCED	HORVU5Hr1G000320	263.002	465.196	380.136	704.546
	9-cis-epoxycarotenoid dioxygenase	NCED	HORVU5Hr1G008050	40.4274	85.0745	113.002	249.173
	9-cis-epoxycarotenoid dioxygenase	NCED	HORVU6Hr1G068720	14.4158	28.6504	18.0171	37.5206
	9-cis-epoxycarotenoid dioxygenase	NCED	HORVU5Hr1G092850	12.2742	36.1486	12.8043	39.5137
	Xanthoxin dehydrogenase	XD	HORVU1Hr1G018140	191.545	1412.4	415.813	3212.76
	Xanthoxin dehydrogenase	XD12	HORVU1Hr1G089830	845.735	1043.58	1068.79	1381.9
	Xanthoxin dehydrogenase	XD4	HORVU2Hr1G021320	6.3525	50.2383	5.07623	42.0653
	Xanthoxin dehydrogenase	XD4	HORVU1Hr1G083910	6.64874	25.8586	7.78769	31.7371
	Abscisic aldehyde oxidase 1	AO1	HORVU5Hr1G103890	4453.26	3002.25	4910.35	3468.75
	Abscisic aldehyde oxidase 2	AO2	HORVU7Hr1G114000	251.45	332.51	382.083	529.423
	Abscisic aldehyde oxidase 4	AO4	HORVU7Hr1G114020	288.199	328.099	415.709	495.901
	ABA 8'-hydroxylase	CYP707A	HORVU5Hr1G068330	79.18	57.3393	94.7568	71.9018
	ABA 8'-hydroxylase	CYP707A	HORVU6Hr1G068690	13.0731	15.1385	25.474	30.9095
	ABA 8'-hydroxylase	CYP707A	HORVU0Hr1G016780	13.8675	8.27702	13.002	8.13161
	ABA 8'-hydroxylase	CYP707A	HORVU5Hr1G118020	14.5391	11.0117	31.5402	25.0307
	ABA 8'-hydroxylase	CYP707A	HORVU1Hr1G051300	12.141	11.7962	8.61462	8.77038
	Pyrabactin resistance 1	PYR1	HORVU1Hr1G070420	109.952	17.1255	209.287	34.1567
	Pyrabactin resistance 1	PYR1	HORVU3Hr1G031380	82.7186	60.7351	44.6291	34.3358
	Pyrabactin resistance 1	PYR1	HORVU7Hr1G088140	244.478	119.167	324.225	165.598
	Pyrabactin resistance 1	PYR1	HORVU1Hr1G030390	24.4414	22.5595	32.8618	31.7825
	Pyrabactin resistance 1	PYR1	HORVU1Hr1G050110	2456.4	1598.59	2580.01	1759.35
	Pyrabactin resistance 1	PYR1	HORVU3Hr1G107030	20.8745	4.33724	4.48981	0.977502
	Pyrabactin resistance 1	PYR1	HORVU4Hr1G055220	1297.72	240.945	1371.88	266.898
	Group A type 2C protein phosphatases	PP2C	HORVU1Hr1G090360	5.40748	43.0925	18.2413	152.319
	Group A type 2C protein phosphatases	PP2C	HORVU2Hr1G000090	122.235	436.833	260.115	974.046
	Group A type 2C protein phosphatases	PP2C	HORVU2Hr1G046600	15.0208	118.781	42.4508	351.748
	Group A type 2C protein phosphatases	PP2C	HORVU7Hr1G098170	125.671	486.49	408.506	1657.03
	Group A type 2C protein phosphatases	PP2C	HORVU3Hr1G050340	154.124	959.187	335.296	2186.52
	Group A type 2C protein phosphatases	PP2C	HORVU3Hr1G085930	288.118	766.893	555.726	1549.95
	Group A type 2C protein phosphatases	PP2C	HORVU4Hr1G071830	210.244	274.265	385.38	526.779
	Group A type 2C protein phosphatases	PP2C	HORVU5Hr1G012020	0.567899	10.8233	0.649763	12.9758
	Group A type 2C protein phosphatases	PP2C	HORVU5Hr1G097060	1504.83	1362.81	1480.07	1404.51
	Group A type 2C protein phosphatases	PP2C	HORVU6Hr1G029160	143.589	145.916	166.604	177.401
	Group A type 2C protein phosphatases	PP2C	HORVU4Hr1G069380	2.66191	13.0571	4.79763	24.6589
	Group A type 2C protein phosphatases	PP2C	HORVU5Hr1G047410	152.128	162.256	139.402	155.795
	ABA-responsive element (ABRE)-binding factor	ABF	HORVU6Hr1G080670	155.4	438.374	247.882	732.709
	ABA-responsive element (ABRE)-binding factor	ABF	HORVU5Hr1G068230	94.3052	231.417	156.644	402.778
	ABA-responsive element (ABRE)-binding factor	ABF	HORVU7Hr1G035500	280.235	608.578	350.45	797.467
Pathway	Full-name of gene	Gene	Gene_ID	Harrington 24 h	Harrington 48 h	Stirling 24 h	Stirling 48 h
c: Aux pathway	YUCCA flavin-containing monooxygenase	YUCCA	HORVU1Hr1G023160	411.725	526.863	465.564	624.256
	YUCCA flavin-containing monooxygenase	YUCCA	HORVU1Hr1G053900	377.234	528.743	456.864	670.985
	YUCCA flavin-containing monooxygenase	YUCCA	HORVU2Hr1G001820	147.468	192.289	207.827	283.956
	YUCCA flavin-containing monooxygenase	YUCCA	HORVU6Hr1G029800	67.5447	92.653	101.576	145.999
	YUCCA flavin-containing monooxygenase	YUCCA	HORVU3Hr1G057950	15.9912	18.3205	29.9576	35.963
	YUCCA flavin-containing monooxygenase	YUCCA	HORVU3Hr1G069580	25.7039	59.9643	45.1732	110.425
	YUCCA flavin-containing monooxygenase	YUCCA	HORVU2Hr1G009900	2.72757	4.69866	2.33362	4.21232
	YUCCA flavin-containing monooxygenase	YUCCA	HORVU2Hr1G010060	290.616	810.342	501.457	1465.13
	YUCCA flavin-containing monooxygenase	YUCCA	HORVU2Hr1G105780	147.455	183.869	122.752	160.388
	YUCCA flavin-containing monooxygenase	YUCCA	HORVU2Hr1G116980	15.9259	80.339	8.87661	46.9204
	YUCCA flavin-containing monooxygenase	YUCCA	HORVU4Hr1G072260	3.68796	12.4863	3.32279	11.7881
	YUCCA flavin-containing monooxygenase	YUCCA	HORVU4Hr1G089360	111.15	186.676	127.347	224.109
	YUCCA flavin-containing monooxygenase	YUCCA	HORVU5Hr1G086660	0.690302	18.1804	0.535595	14.7807
	YUCCA flavin-containing monooxygenase	YUCCA	HORVU5Hr1G086710	3.25216	8.56708	3.27691	9.04521
	YUCCA flavin-containing monooxygenase	YUCCA	HORVU7Hr1G121260	0.90207	9.02309	0.139507	1.46219
	YUCCA flavin-containing monooxygenase	YUCCA	HORVU7Hr1G121500	114.324	150.104	93.8327	129.093
	YUCCA flavin-containing monooxygenase	YUCCA	HORVU2Hr1G114180	625.434	669.027	366.91	411.258
	YUCCA flavin-containing monooxygenase	YUCCA	HORVU7Hr1G027520	1536.39	24.2521	38.2604	0.632832
	Transport inhibitor response 1-like protein	TIR1/AFB	HORVU5Hr1G075620	52.2553	54.7867	48.4236	53.1979
	Transport inhibitor response 1-like protein	TIR1/AFB	HORVU1Hr1G021550	1382.39	1613.6	1946.6	2380.87
	Transport inhibitor response 1-like protein	TIR1/AFB	HORVU2Hr1G070800	1078.84	1125.88	1380.32	1509.41
	Auxin F-box protein 5	TIR1/AFB	HORVU6Hr1G077570	731.504	722.591	954.432	987.901
	Auxin F-box protein 5	TIR1/AFB	HORVU4Hr1G078120	591.05	485.522	768.027	661.08
	Auxin/indole-3-acetic acid protein	AUX/IAA	HORVU0Hr1G021630	34.0574	76.3434	45.3488	106.517
	Auxin/indole-3-acetic acid protein	AUX/IAA	HORVU1Hr1G028170	36.0814	46.312	31.6118	42.5159
	Auxin/indole-3-acetic acid protein	AUX/IAA	HORVU1Hr1G086070	423.858	564.628	559.49	780.955
	Auxin/indole-3-acetic acid protein	AUX/IAA	HORVU3Hr1G019750	331.719	427.213	285.906	385.825
	Auxin/indole-3-acetic acid protein	AUX/IAA	HORVU3Hr1G031460	646.475	1034.04	710.451	1190.72
	Auxin/indole-3-acetic acid protein	AUX/IAA	HORVU5Hr1G094270	126.111	192.489	122.792	196.389
	Auxin/indole-3-acetic acid protein	AUX/IAA	HORVU5Hr1G106350	28.7997	63.1849	24.9159	57.2789
	Auxin/indole-3-acetic acid protein	AUX/IAA	HORVU6Hr1G088140	11.5093	30.9912	19.3006	54.4569
	Auxin/indole-3-acetic acid protein	AUX/IAA	HORVU7Hr1G084940	142.25	347.693	104.167	266.788
	Auxin/indole-3-acetic acid protein	AUX/IAA	HORVU3Hr1G022540	397.899	369.553	467.728	455.187
	Auxin/indole-3-acetic acid protein	AUX/IAA	HORVU1Hr1G025670	1087.92	930.679	1147.38	1028.5
	Auxin/indole-3-acetic acid protein	AUX/IAA	HORVU2Hr1G112440	70.1894	38.2901	76.1119	43.5071
	Auxin/indole-3-acetic acid protein	AUX/IAA	HORVU4Hr1G016160	105.74	91.6952	94.0792	85.4854
	Auxin/indole-3-acetic acid protein	AUX/IAA	HORVU5Hr1G093580	543.19	223.53	970.968	418.68
	Auxin/indole-3-acetic acid protein	AUX/IAA	HORVU5Hr1G093640	776.091	623.277	883.928	743.837
	Auxin response factor	ARF	HORVU1Hr1G076690	63.9458	78.9844	68.0829	88.117
	Auxin response factor	ARF	HORVU6Hr1G020330	211.843	230.211	196.612	223.88
	Auxin response factor	ARF	HORVU1Hr1G041770	296.314	174.247	432.824	266.697
	Auxin response factor	ARF	HORVU1Hr1G051780	55.7355	24.1008	52.9528	23.9928
	Auxin response factor	ARF	HORVU2Hr1G109650	198.05	102.445	203.145	110.107
	Auxin response factor	ARF	HORVU3Hr1G010140	20.6705	13.0589	26.8347	17.7642
	Auxin response factor	ARF	HORVU3Hr1G032230	142.023	117.187	135.9	117.498
	Auxin response factor	ARF	HORVU6Hr1G026730	1082.85	742.027	1276.01	916.214
	Auxin response factor	ARF	HORVU7Hr1G108360	139.35	31.087	47.5268	11.1097
	Auxin response factor	ARF	HORVU7Hr1G051930	2270.97	2042.77	2834.96	2672.07
	IAA amidohydrolases like	ILR1-like	HORVU2Hr1G089950	153.338	305.643	215.68	450.471
	IAA amidohydrolases like	ILR1-like	HORVU3Hr1G048560	276.224	472.649	351.343	629.944
	IAA amidohydrolases like	ILR1-like	HORVU7Hr1G099580	13.4994	13.316	27.2604	28.1765
	IAA amidohydrolases like	ILR1-like	HORVU5Hr1G055060	132.682	203.461	149.491	240.202
	IAA amidohydrolases like	ILR1-like	HORVU3Hr1G066450	213.904	473.794	123.084	285.669
	IAA amidohydrolases like	ILR1-like	HORVU5Hr1G027710	44.0209	86.8061	30.8285	63.6995
	IAA amidohydrolases like	ILR1-like	HORVU2Hr1G012850	2.79369	3.83533	0.83633	1.20308
	IAA amidohydrolases like	ILR1-like	HORVU5Hr1G118040	5.74165	12.3237	3.57532	8.04105
	Acyl acid-amido synthetase	GH3	HORVU2Hr1G019970	23.2125	26.0994	24.2704	28.5942
	Acyl acid-amido synthetase	GH3	HORVU3Hr1G074230	330.254	272.758	329.463	285.121
	Acyl acid-amido synthetase	GH3	HORVU1Hr1G092890	68.2391	119.876	76.538	140.887
	Acyl acid-amido synthetase	GH3	HORVU2Hr1G088460	42.0675	21.1827	48.2854	25.4767
	Acyl acid-amido synthetase	GH3	HORVU3Hr1G029670	89.7608	151.937	130.322	231.146
	Acyl acid-amido synthetase	GH3	HORVU2Hr1G034670	305.547	114.983	536.94	211.726
	Acyl acid-amido synthetase	GH3	HORVU2Hr1G034680	3.90699	1.59813	6.02667	2.58309
	Auxin efflux carrier family protein	EIR	HORVU3Hr1G057630	7.95272	10.5509	6.06206	8.42727
	Auxin efflux carrier family protein	EIR	HORVU3Hr1G067670	7.44402	8.32849	5.93608	6.95906
	Auxin efflux carrier family protein	EIR	HORVU3Hr1G094000	2.19281	7.87206	0.821767	3.09121
	Auxin efflux carrier family protein	EIR	HORVU3Hr1G114270	81.8743	54.4968	63.6399	44.3859
	Auxin efflux carrier family protein	EIR	HORVU7Hr1G110470	1116.36	535.281	1288.53	647.39
	Auxin efflux carrier family protein	EIR	HORVU0Hr1G031980	20.8402	15.2866	9.60904	7.38552
	Auxin efflux carrier family protein	EIR	HORVU3Hr1G078620	104.028	25.263	96.7549	24.6208
	Auxin efflux carrier family protein	EIR	HORVU4Hr1G026680	137.066	144.787	117.683	130.259
	Auxin efflux carrier family protein	EIR	HORVU4Hr1G082680	6.05967	22.0345	20.2192	77.0391
	Auxin efflux carrier family protein	EIR	HORVU5Hr1G087880	248.869	124.693	284.724	149.482
	Auxin efflux carrier family protein	EIR	HORVU7Hr1G038700	2545.32	1582.49	2629.35	1712.92
Pathway	Full-name of gene	Gene	Gene_ID	Harrington 24 h	Harrington 48 h	Stirling 24 h	Stirling 48 h
d: CK pathway	Isopentenyl transferase	IPT	HORVU1Hr1G083530	9.69701	3.41079	8.94471	3.29668
	Isopentenyl_x005f_x0002_transferase	IPT	HORVU7Hr1G120070	57.5738	43.3889	68.1872	53.8455
	CK nucleoside 5′-monophosphate phosphoribohydrolase	LOG	HORVU1Hr1G094290	0.824628	2.39111	1.61544	4.90824
	CK nucleoside 5′-monophosphate phosphoribohydrolase	LOG	HORVU3Hr1G050770	6.19412	11.2315	11.0755	21.0433
	CK nucleoside 5′-monophosphate phosphoribohydrolase	LOG	HORVU5Hr1G086520	2.30903	4.21302	2.69695	5.1562
	CK nucleoside 5′-monophosphate phosphoribohydrolase	LOG	HORVU2Hr1G089620	25.119	17.9542	18.5351	13.882
	CK nucleoside 5′-monophosphate phosphoribohydrolase	LOG	HORVU4Hr1G079860	59.0368	37.9676	203.96	137.445
	CK oxidase/dehydrogenase	CKX	HORVU3Hr1G027430	5.20497	5.75921	4.94505	5.73334
	CK oxidase/dehydrogenase	CKX	HORVU1Hr1G042360	13.7348	22.7498	7.48662	12.9937
	CK oxidase/dehydrogenase	CKX	HORVU3Hr1G075920	16.9491	17.5158	24.1433	26.144
	CK oxidase/dehydrogenase	CKX	HORVU3Hr1G019850	670.78	136.2	553.872	117.842
	Histidine kinase	HK	HORVU7Hr1G111360	113.187	101.732	168.595	158.781
	Histidine kinase	HK	HORVU7Hr1G048310	10.1215	17.8715	12.3599	22.8679
	Histidine phosphotransfer protein	HP	HORVU1Hr1G075830	13.6148	20.8617	19.4982	31.3058
	Type A response regulator	ARR	HORVU3Hr1G114970	501.08	421.365	831.441	732.613
	Type A response regulator	ARR	HORVU5Hr1G097560	851.016	629.617	1013.26	785.509
	Type A response regulator	ARR	HORVU6Hr1G028680	1301.75	1129.71	1362.75	1239.21
	Type A response regulator	ARR	HORVU6Hr1G085590	29.4505	20.9993	49.1795	36.7442
	Type A response regulator	ARR	HORVU3Hr1G108540	1536.59	1785.36	1582.22	1926.33
	Type A response regulator	ARR	HORVU2Hr1G020140	29.547	101.563	36.7782	132.467
	Type A response regulator	ARR	HORVU5Hr1G018220	181.92	260.509	246.215	369.445
	Type A response regulator	ARR	HORVU3Hr1G032440	108.668	158.353	97.7328	149.23
	Type A response regulator	ARR	HORVU4Hr1G021010	19.8235	28.6202	31.135	47.1013
	Type A response regulator	ARR	HORVU5Hr1G081620	380.986	393.685	484.974	525.111
	Type A response regulator	ARR	HORVU7Hr1G030050	36.4846	35.5049	56.8071	57.926
	Type A response regulator	ARR	HORVU3Hr1G086000	36.0465	36.2113	62.5525	65.8443
Pathway	Full-name of gene	Gene	Gene_ID	Harrington 24 h	Harrington 48 h	Stirling 24 h	Stirling 48 h
e: ETH pathway	S-adenosylmethionine synthase	S-AdoMetds	HORVU6Hr1G034650	3590.47	5229.14	4637.01	7076.37
	S-adenosylmethionine synthase	S-AdoMetds	HORVU6Hr1G063490	10452.4	12121.5	8873.28	10782.4
	S-adenosylmethionine synthase	S-AdoMetds	HORVU6Hr1G063540	5382.18	5448.02	5202.16	5517.69
	S-adenosylmethionine synthase	S-AdoMetds	HORVU6Hr1G063570	104.645	112.744	53.017	59.8524
	S-adenosylmethionine synthase	S-AdoMetds	HORVU6Hr1G063560	148.163	138.387	74.3952	72.8104
	ACC synthase	ACS	HORVU2Hr1G094230	19.2781	96.8639	21.4401	112.88
	ACC synthase	ACS	HORVU3Hr1G019430	52.2208	83.3472	38.1574	63.8144
	ACC synthase	ACS	HORVU4Hr1G009800	13.9863	22.8811	17.3382	29.7214
	ACC synthase	ACS	HORVU3Hr1G019410	101.091	107.239	63.2139	70.2656
	ACC oxidase	ACO	HORVU1Hr1G020410	6.66071	9.48353	8.17305	12.1934
	ACC oxidase	ACO	HORVU1Hr1G020450	31.2973	80.4629	41.4759	111.732
	ACC oxidase	ACO	HORVU4Hr1G017660	3.29879	8.97991	3.63511	10.3688
	ACC oxidase	ACO	HORVU5Hr1G067530	174.51	603.044	150.316	544.285
	ACC oxidase	ACO	HORVU6Hr1G079600	38.383	53.8855	36.85	54.208
	ACC oxidase	ACO	HORVU5Hr1G067490	36.2286	212.911	24.539	151.111
	ACC oxidase	ACO	HORVU2Hr1G114980	171.979	118.524	208.439	150.522
	ACC oxidase	ACO	HORVU6Hr1G079640	256.226	122.539	132.577	66.4376
	ACC oxidase	ACO	HORVU7Hr1G086650	21.8502	3.74502	22.6601	4.06962
	ACC oxidase	ACO	HORVU7Hr1G116830	288.111	29.3341	267.707	28.5605
	Ethylene receptor 1	ETR1	HORVU4Hr1G006260	511.409	620.617	548.015	696.852
	Ethylene receptor 2	ETR2	HORVU5Hr1G115160	5.75561	8.08124	6.48626	9.54276
	Ethylene receptor 2	ETR2	HORVU4Hr1G061120	313.466	412.305	398.377	549.055
	Ethylene response sensor 1	ERS1	HORVU5Hr1G000590	276.262	227.29	392.4	338.283
	Ethylene response sensor 2	ERS2	HORVU6Hr1G080170	74.3883	104.057	86.9022	127.376
	Ethylene receptor 1	ETR	HORVU1Hr1G022550	317.545	228.739	455.146	343.541
	Ethylene receptor 4	ETR	HORVU6Hr1G071860	3.51834	17.5232	12.1378	63.3441
	Ethylene receptor 4	ETR	HORVU6Hr1G080180	90.1071	251.49	120.995	353.852
	Ethylene receptor 3	ETR	HORVU6Hr1G091700	1334.17	394.3	1488.5	460.954
	Ethylene receptor 2	ETR	HORVU0Hr1G001750	31.8563	22.0967	40.3683	29.3404
Pathway	Full-name of gene	Gene	Gene_ID	Harrington 24 h	Harrington 48 h	Stirling 24 h	Stirling 48 h
f: BR pathway	Dwarf 4/ Steroid 22α-hydroxylase	DWF4	HORVU4Hr1G065440	169.8	69.6235	161.219	69.267
	Steroid 5-alpha-reductase/ De-etiolated 2	DET2	HORVU4Hr1G060850	1855.68	2166.88	2085.94	2552.27
	Steroid 5-alpha-reductase/De-etiolated 2	DET2	HORVU3Hr1G085400	233.667	242.322	343.349	373.099
	Steroid 23-alpha-hydroxylase/Constitutive photomorphogenesis and dwarfism	CPD/ CYP90A1	HORVU5Hr1G043140	527.021	516.065	649.17	666.082
	Rotundifolia 3/ Cytochrome P450 90C1	ROT3 /CYP90C1	HORVU3Hr1G018860	182.622	181.838	304.179	317.361
	Cytochrome P450 90D1	CYP90D1	HORVU2Hr1G081650	56.6559	60.2594	72.793	81.1265
	Cytochrome P450 90D2	CYP90D2	HORVU6Hr1G065340	10.718	7.95859	9.17233	7.13662
	Dwarf 1/Delta(24)-sterol reductase	DWF1	HORVU7Hr1G120030	4482.22	4243.18	4042.21	4009.68
	Brassinosteroid-6-oxidase 1	BR6ox1/ CYP85A1	HORVU2Hr1G002250	21.9682	9.90932	30.6764	14.4993
	Brassinosteroid-6-oxidase 1	BR6ox1/ CYP85A1	HORVU2Hr1G095080	7.96757	16.6559	2.80169	6.13699
	phyB activation-tagged suppressor 1	BAS1/ CYP734A1	HORVU3Hr1G023910	45.432	63.2016	46.0195	67.0811
	Sterol methyltransferase	SMT1	HORVU4Hr1G084000	596.478	832.259	662.515	968.617
	Sterol methyltransferase	SMT3	HORVU1Hr1G052620	1165.62	823.101	970.952	718.435
	Sterol methyltransferase	SMT2	HORVU4Hr1G080780	1655.4	1526.96	1958.33	1892.79
	Brassinosteroid insensitive 1	BRI1	HORVU3Hr1G068000	82.4116	47.9864	100.17	61.1165
	Brassinosteroid insensitive 1	BRI1	HORVU3Hr1G068020	8.38894	5.99017	9.15804	6.85215
	Brassinosteroid insensitive 1	BRI1	HORVU5Hr1G053840	321.617	139.79	364.629	166.066
	Brassinosteroid insensitive 1	BRI1	HORVU3Hr1G018030	73.9592	74.9828	66.0699	70.1885
	BRI1 kinase inhibitor 1	BKI1	HORVU5Hr1G068600	19.2232	18.6627	19.961	20.306
	BRI1-associated receptor kinase 1	BAK1	HORVU6Hr1G049080	812.257	498.844	880.924	566.894
	BRI1-associated receptor kinase 1	BAK1	HORVU7Hr1G068990	254.569	158.237	213.693	139.183
	BRI1-associated receptor kinase 1	BAK1	HORVU2Hr1G080020	205.33	192.894	244.461	240.641
	Brassinosteroid-signaling kinase 1	BSK1	HORVU1Hr1G052350	9.2479	12.1407	13.5107	18.5854
	Brassinosteroid-signaling kinase 1	BSK1	HORVU4Hr1G081600	315.189	373.537	337.424	419.017
	Protein CONSTITUTIVE DIFFERENTIAL GROWTH 1	CDG1	HORVU3Hr1G099120	1.43263	1.37598	5.24012	5.27367
	Serine/threonine-protein phosphatase BSU1,Bri1 suppressor protein 1	BSU1	HORVU1Hr1G019330	604.401	473.535	746.961	613.221
	Brassinosteroid signaling positive regulator (BZR1) family protein	BES1/ BZR1	HORVU0Hr1G040070	426.59	198.718	430.143	209.957
	Brassinosteroid signaling positive regulator (BZR1) family protein	BES1/ BZR1	HORVU7Hr1G088980	797.13	434.612	963.897	550.676
	Brassinosteroid signaling positive regulator (BZR1) family protein	BES1/ BZR1	HORVU3Hr1G026420	453.274	423.837	553.614	542.423
	Brassinosteroid signaling positive regulator (BZR1) family protein	BES1/ BZR1	HORVU6Hr1G081650	22.9171	20.6809	26.0259	24.6097
Pathway	Full-name of gene	Gene	Gene_ID	Harrington 24 h	Harrington 48 h	Stirling 24 h	Stirling 48 h
g: JA pathway	Lipoxygenase	LOX	HORVU5Hr1G093700	15471.9	32987	16919.9	37799.7
	Lipoxygenase	LOX	HORVU4Hr1G005920	21175.7	23932.7	26333.6	31185.9
	Lipoxygenase	LOX	HORVU5Hr1G093770	372.781	3545.71	192.248	1916.04
	Lipoxygenase	LOX	HORVU2Hr1G115960	71.5387	424.629	14.7277	91.6
	Lipoxygenase	LOX	HORVU5Hr1G001180	588.035	1525.98	307.316	835.649
	Lipoxygenase	LOX	HORVU5Hr1G117110	331.139	908.65	165.052	474.57
	Lipoxygenase	LOX	HORVU6Hr1G000510	4.05405	47.8019	0.217927	2.69253
	Lipoxygenase	LOX	HORVU5Hr1G054200	6.45222	18.8937	2.30657	7.07728
	Lipoxygenase	LOX	HORVU4Hr1G076570	217.238	277.551	329.761	441.469
	Lipoxygenase	LOX	HORVU1Hr1G054390	119.749	93.5087	134.096	109.721
	Lipoxygenase	LOX	HORVU2Hr1G078510	260.597	228.82	292.274	268.91
	Lipoxygenase	LOX	HORVU6Hr1G033600	56.3726	43.3885	62.2854	50.2326
	Lipoxygenase	LOX	HORVU7Hr1G050680	8.71574	5.82978	6.29979	4.41536
	Allene oxide synthase	AOS	HORVU4Hr1G066270	10144.9	14149.8	10414.6	15220.8
	Allene oxide synthase	AOS	HORVU6Hr1G039440	1178.79	1512.33	1253.41	1684.98
	Allene oxide synthase	AOS	HORVU4Hr1G066230	8.69066	57.4455	2.76025	19.1181
	Allene oxide synthase	AOS	HORVU5Hr1G098090	527.064	530.05	611.76	644.655
	Allene oxide synthase	AOS	HORVU6Hr1G005250	47.2338	181.964	42.5375	171.71
	Allene oxide cyclase	AOC	HORVU6Hr1G081000	1721.45	1621.21	1813.81	1789.9
	12-oxo-phytodienoic acid reductase	OPR	HORVU2Hr1G004230	9704.55	4355.65	12302.2	5785.66
	12-oxo-phytodienoic acid reductase	OPR	HORVU7Hr1G036070	3086.43	291.056	4823	476.574
	12-oxo-phytodienoic acid reductase	OPR	HORVU1Hr1G001950	1187.33	989.722	998.099	871.779
	12-oxo-phytodienoic acid reductase	OPR	HORVU7Hr1G095960	612.415	597.531	605.857	619.409
	12-oxo-phytodienoic acid reductase	OPR	HORVU1Hr1G001850	893.908	891.149	1218.77	1273.12
	12-oxo-phytodienoic acid reductase	OPR	HORVU1Hr1G001960	228.66	355.873	428.137	698.202
	12-oxo-phytodienoic acid reductase	OPR	HORVU7Hr1G036060	48.6243	69.4006	31.3552	46.8934
	12-oxo-phytodienoic acid reductase	OPR	HORVU7Hr1G118010	24.0172	61.9008	29.3661	79.3072
Pathway	Full-name of gene	Gene	Gene_ID	Harrington 24 h	Harrington 48 h	Stirling 24 h	Stirling 48 h
h: SA pathway	Isochorismate synthase	ICS	HORVU5Hr1G057050	4603.77	5806.17	4679	6183.32
	Enhanced diseasesu sceptibility 5	EDS5	HORVU6Hr1G012070	40.2059	34.4314	42.7472	38.3588
	Enhanced pseudomonas susceptibility 1	EPS1	HORVU1Hr1G072050	52.426	50.407	54.9911	55.4024
	Phenylalanine Ammonia-Lyase	PAL1	HORVU6Hr1G058820	150.872	429.34	154.864	461.78
	Phenylalanine Ammonia-Lyase	PAL2	HORVU0Hr1G016330	8492	10328.2	8797	11210.9
	Phenylalanine Ammonia-Lyase	PAL3	HORVU6Hr1G058840	20.0115	57.4618	18.7713	56.4791
	Phenylalanine Ammonia-Lyase	PAL6-1	HORVU1Hr1G022060	0.205656	0.244107	4.57424	5.68919
	Phenylalanine Ammonia-Lyase	PAL6-2	HORVU2Hr1G038140	78.193	123.903	74.1884	123.181
	Phenylalanine Ammonia-Lyase	PAL6-5	HORVU2Hr1G089440	1539.81	1846.31	1673.85	2103.03
	Transcription factor TGA	TGA	HORVU3Hr1G079010	249.343	227.261	421.605	402.648

## Sheet:  Table S4
Table S4 The primers used in the study
Primers	F（5-3）	R（5-3）
HORVU5Hr1G103890	ACGGGCTCGGAAGGTAGA	GTCGGTAGCAAGTGAAGACAGG
HORVU6Hr1G034650	GGCAAGGACCCAACCAAG	TCAGGCACGCCAATAGCA
HORVU6Hr1G063490	GTCGCTCTGTCACTTTCGCT	GCGGAGCACAGAACCATAGA
HORVU0Hr1G016330	TTGTGCCGCTGTCCTACATT	AGTGGATGCAAGACCAGAGC
HORVU4Hr1G066270	AGCAACGATCCTTACACCGT	TCCGGCTTATTACACTGGGC
HORVU4Hr1G060850	ACTTACGGCTGGCAGTGAAA	AGGTCGCCTTATCCTTTGGC
HORVU4Hr1G006930	TCGGGTTACCACTCTACGGT	GAACTGGGAACGAAGGAGGG
HORVU7Hr1G027520	GCAGTTGACATTTCGAGGGAC	GCATTTACCATGGAATGAAGCCA
Actin	TCGCAACTTAGAAGCACTTCCG	AAGTACAGTGTCTGGATTGGAGGG

## Sheet: Table S5
Table S5 Distribution of 24 h germination rate, 48 h germination rate, germination potential and germination index of 236 barley varieties
measurement index	GR24	GR48	GI
Mean	0.2347	0.5873	45.28
Max	0.9667	0.97	97.17
Min	0.01	0.0767	5.22
Sd	19.43	23.85	18.67
CV	0.828	0.4061	0.4124

## Sheet: Table S6
Table S6 Information about 11 varieties with germination index below 25
Variety	Germination index
USA 8330-1679	5.22
260	8.06
Troon	13.06
Linnus	15
262	18
Irene	18.22
C2-05-337-2	18.61
Stirling	20.61
261	21.72
MSS 87	22.67
Clipper	23.72

## Sheet: Table S7
Table S7 Information of 12 varieties with germination index higher than 75
Variety	Germination index
SHEBA	97.17
Morex	92.83
ETHIOPIA 602	89.28
Barke	88.67
87 UM	85.89
48 UM	81.89
137 UM	81.67
BVC-3	81.67
Harrington	79
HB10315	78.94
BANDIT	78.28
BVDV-008	75.17

## Sheet: Table S8
Table S8 To compare 19 candidate genes with PAVs in the pan-genome
Pathway	Full-name of gene	Gene	Gene_ID	Sequence change
GA	ent-kaurenoic acid oxidase	KAO1	HORVU7Hr1G003090	single nucleotide polymorphism
AUX	Flavin-containing monooxygenase	YUCCA	HORVU2Hr1G010060
ABA	9-cis-epoxycarotenoid dioxygenase	NCED	HORVU5Hr1G000320	Multi-base substitution
GA	Gibberellin receptor GID1	GID1	HORVU1Hr1G060810	Large fragments inserted or missing
GA	DELLA protein GAI	DELLA	HORVU4Hr1G006930
ABA	Pyrabactin resistance 1	PYR1	HORVU1Hr1G050110
ABA	Group A type 2C protein phosphatases	PP2C	HORVU5Hr1G097060
ABA	Group A type 2C protein phosphatases	PP2C	HORVU3Hr1G085930
AUX	Transport inhibition resistant1/auxin signaling F-box	TIR1/AFB	HORVU1Hr1G021550
AUX	Transport inhibition resistant1/auxin signaling F-box	TIR1/AFB	HORVU2Hr1G070800
AUX	Auxin response factor	ARF	HORVU6Hr1G026730
AUX	IAA amidohydrolases like	ILR1-like	HORVU3Hr1G048560
AUX	Acyl acid-amido synthetase	GH3	HORVU2Hr1G034670
ETH	Ethylene receptor 2	ETR2	HORVU5Hr1G115160
BR	BRI1-associated receptor kinase 1	BAK1	HORVU6Hr1G049080
BR	Brassinosteroid signaling positive regulator (BZR1) family protein	BES1/ BZR1	HORVU0Hr1G040070
JA	Allene oxide synthase	AOS	HORVU4Hr1G066270
SA	Phenylalanine Ammonia-Lyase	PAL2	HORVU0Hr1G016330
SA	Phenylalanine Ammonia-Lyase	PAL6-5	HORVU2Hr1G089440
